# Supplementary material for: MoO2nanocrystals interconnected on mesocellular carbon foam as a powerful catalyst for vanadium redox flow battery
Source: Royal Society of Chemistry journal article supplement (doi:10.1039/c5ra24626a), 2016-01-01
Supplement: c5ra24626a1.pdf [file c5ra24626a1.pdf]

## RSC Advances Supporting Information

### **MoO<sub>2</sub> Nanocrystals Interconnected on Mesocellular Carbon Foam as Powerful Catalyst for Vanadium Redox Flow Battery**

Hien Thi Thu Pham<sup>a,‡</sup>, Changshin Jo<sup>b,‡</sup>, Jinwoo Lee<sup>b,\*</sup>, and Yongchai Kwon<sup>a,\*\*</sup>

<sup>a</sup>Graduate school of Energy and Environment, Seoul National University of Science and Technology,  
232 Gongneung-ro, Nowon-gu, Seoul, 139-743, Republic of Korea.

<sup>b</sup>Department of Chemical Engineering, Pohang University of Science and Technology (POSTECH),  
77 Cheongam-ro, Nam-gu, Pohang, Kyungbuk 790-784, Republic of Korea.

<sup>‡</sup> HTT Pham and C Jo contributed equally to this work and should be co-first authors

<sup>\*\*</sup>Corresponding author. Tel: +82 29706805, Fax: +82 29706800, E-mail address:

kwony@seoultech.ac.kr

<sup>\*</sup>Corresponding author. Tel: +82 54 2792395, Fax: +82 54 2795528, E-mail address:

jinwoo03@postech.ac.kr

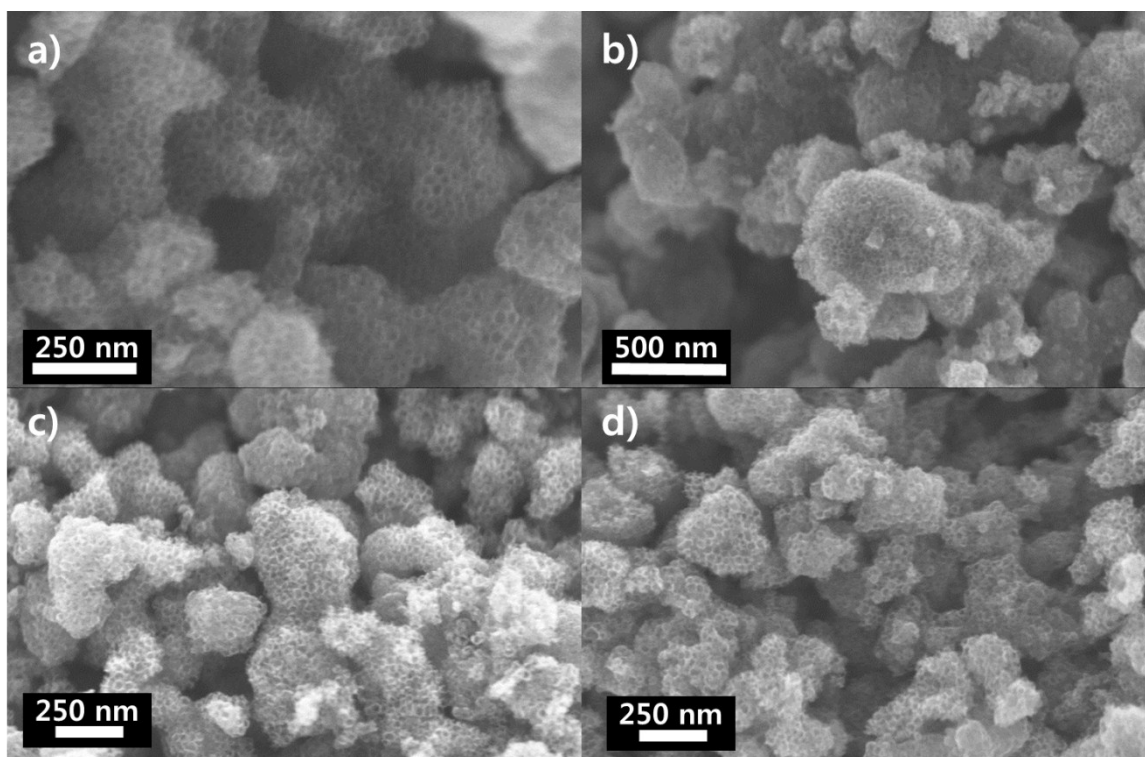

**Fig. S1.** Scanning electron microscopy images for a) MSU-F-C, b) MoO<sub>2</sub>/MSU-F-C-1, c) MoO<sub>2</sub>/MSU-F-C-2, and d) MoO<sub>2</sub>/MSU-F-C-3, respectively.

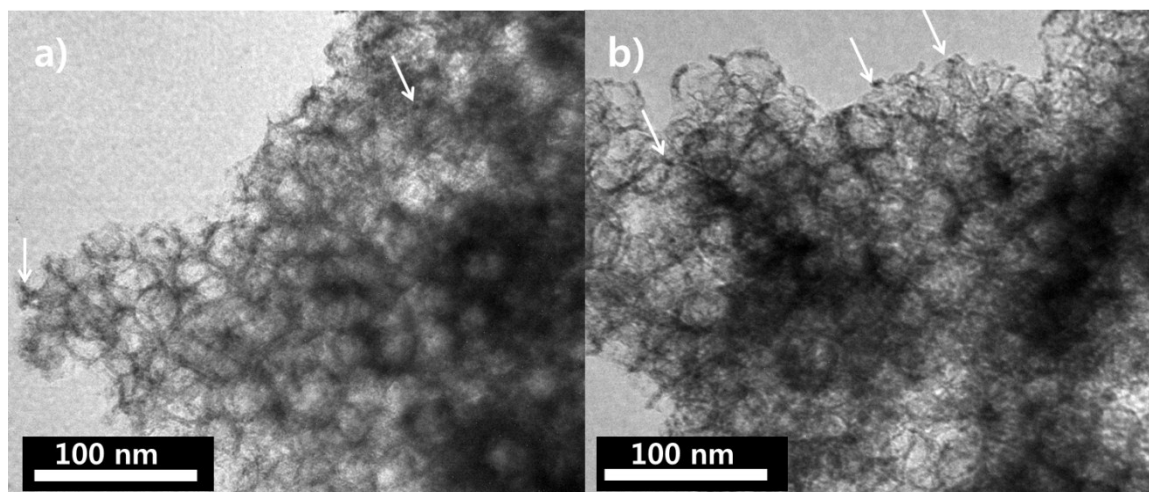

**Fig. S2.** Transmission electron microscopy images for a) MoO<sub>2</sub>/MSU-F-C-1 and b) MoO<sub>2</sub>/MSU-F-C-2.

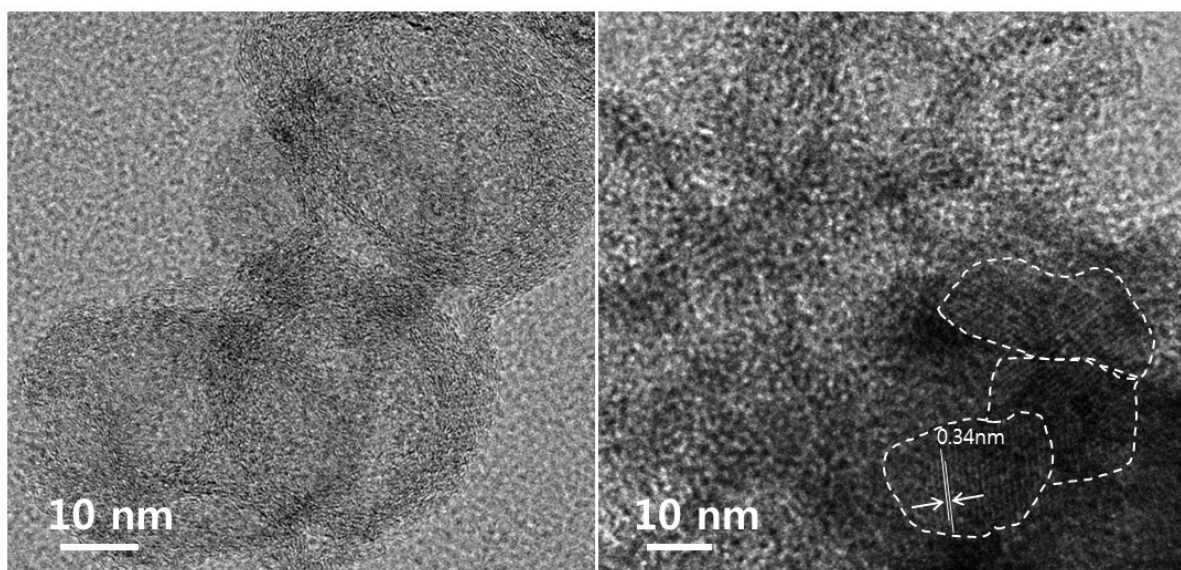

**Fig. S3.** High resolution transmission electron microscope images of a) MoO<sub>2</sub>/MSU-F-C-1 and b) MoO<sub>2</sub>/MSU-F-C-3 (the marked space corresponds with (-111) plane of MoO<sub>2</sub>).

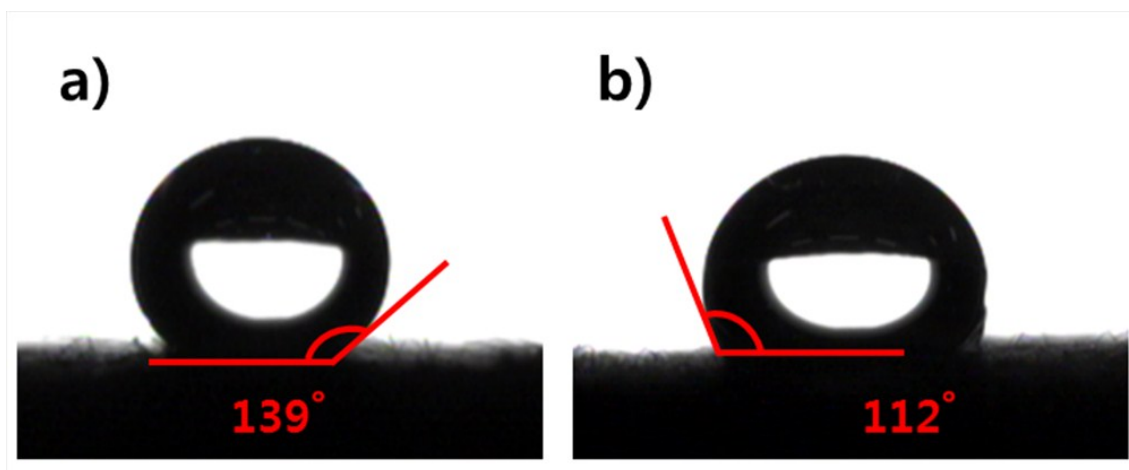

**Fig. S4.** The static contact angles of water drop on a) MSU-F-C and b) MoO<sub>2</sub>/MSU-F-C-2 electrodes, respectively.

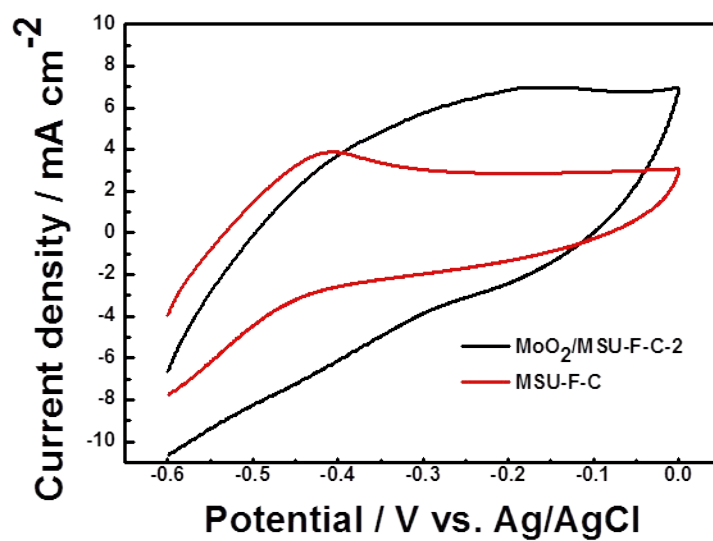

**Fig. S5.** CV curves of MoO<sub>2</sub>/MSU-F-C-2 and MSU-F-C catalysts measured under electrolyte of 0.1 M VOSO<sub>4</sub> + 0.1 M H<sub>2</sub>SO<sub>4</sub>. Potential scan rate was 100mV s<sup>-1</sup> and potential scan range of CVs was from -0.6 to 0.0 V vs. Ag/AgCl.

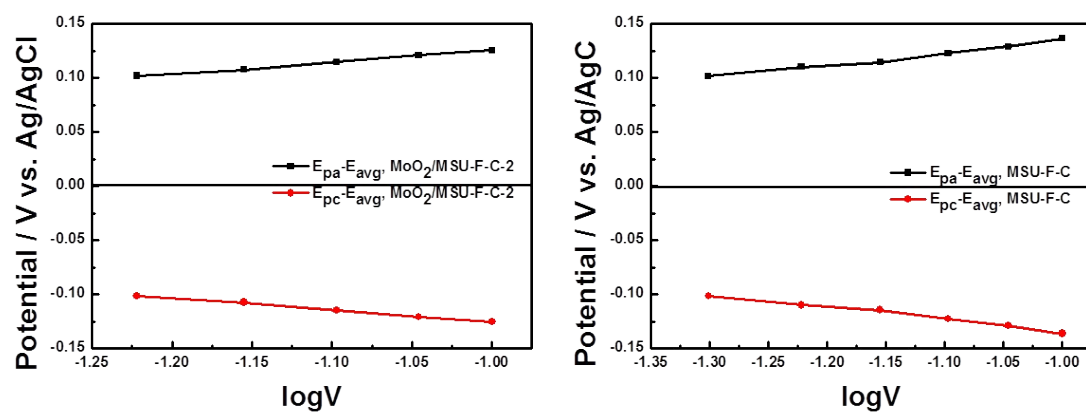

**Fig. S6.** Relationships between logarithms of scan rates and differences in redox peak potentials and average peaks.

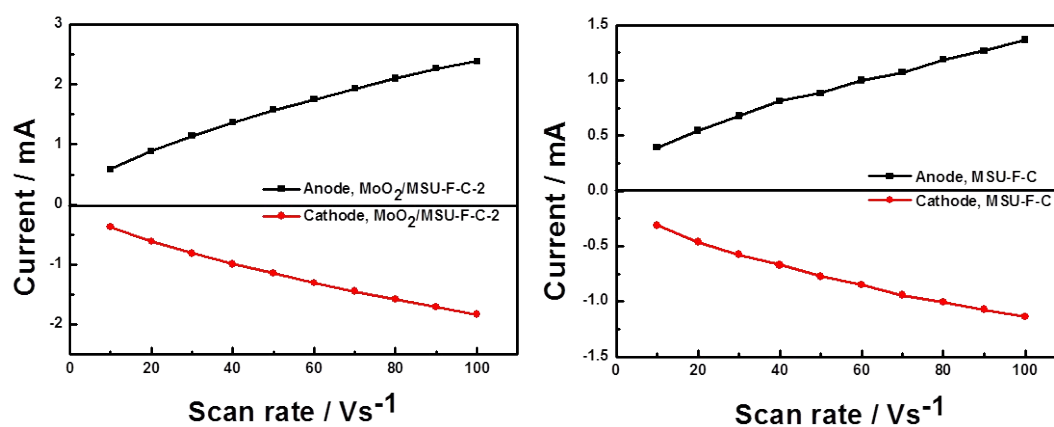

**Fig. S7.** Relationships between potential scan rates and redox peak currents.

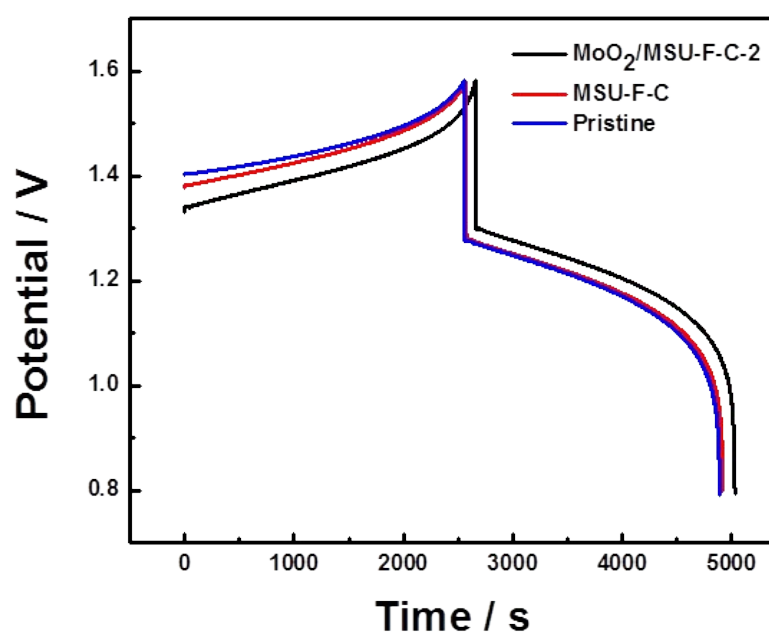

**Fig S8.** Charge–discharge curves of the 15<sup>th</sup> cycle of VRFB single cells consisting of MoO<sub>2</sub>/MSU-F-C, MSU-F-C catalysts, and graphite felt as positive electrode at current density of 40 mAcm<sup>-2</sup>.

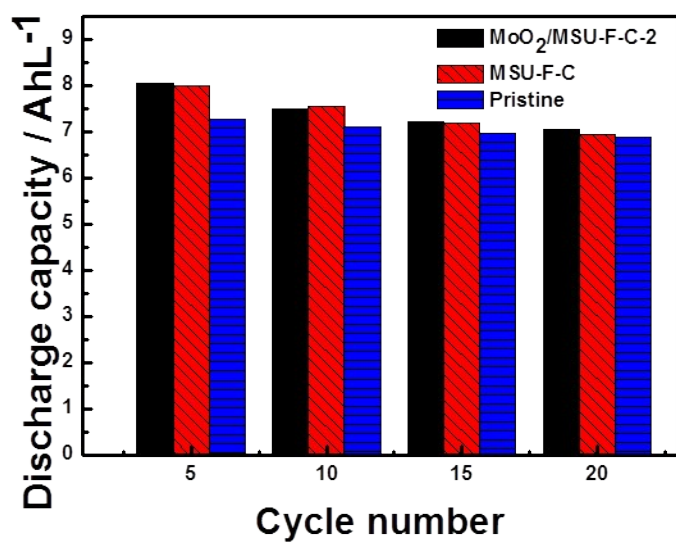

**Fig. S9.** Discharge capacity of VRFB single cells consisting of MoO<sub>2</sub>/MSU-F-C, MSU-F-C catalysts, and graphite felt as positive electrode at current density of 40 mAcm<sup>-2</sup>.
